# Supplementary material for: Formation of Nickel(II)Porphyrin and Its Interaction with DNA in Aqueous Medium
Source: Preprints.org preprint supplement (doi:10.20944/preprints202101.0434.v1), 2021-01-22
Supplement: Supplementary file 1 [file supplementary]

**Formation of nickel(II)porphyrin and its interaction with DNA in aqueous medium**

Ahsan Habib1*, Salma Serniabad1,2, Mohammad Shamim Khan1, Rokayea Islam1, Mrittika Chakraborty1, Aklima Nargis1, Md Emran Quayum1, Md Ashraful Alam2, Valentina Rapozzi3, Masaaki Tabata4

1Department of Chemistry, University of Dhaka, Dhaka-1000, Bangladesh

2Department of Applied Chemistry and Chemical Engineering, Noakhali Science and Technology University, Noakhali 3814, Bangladesh

3Department of Medicine, Udine University, P.le Kolbe 4, 33100, Udine, Italy

4Department of Chemistry, Faculty of Science and Engineering, Saga University

1, Honjo-machi, Saga 840-8502, Japan

Corresponding author’s email: habibchem@du.ac.bd

Supplementary Figure S-1. Absorption spectra of 1.0×10-3 M Ni(II) in 0.10 M NaNO3 solution at 25 ±1 0C in a pH range from 2.97 to 11.40. At low pH, the LMCT absorption is centered at 391 nm. Spectra correspond to the shift from the field of dominance of [Ni(H2O)6]2+ to [Ni(H2O)6-n(OH)n]2-n as a function of solution pH.

Supplementary Figure S-2. Fluorescence spectra of (a) [Ni(II)TMPyP]4+ and (b) [H2TMPyP]4+ in the presence of DNA of (1) 0, (2) 0.56 5, (3) 2.22, (4) 4.43, (5) 6.06, (6) 7.96 × 10-6 M base pairs at pH 7.40 (HEPES). Total concentration of the porphyrin is 1.14 × 10-5 M. Cell path length is 10 mm.
